# Supplementary material
Source: PubMed Central journal article supplement (PMC5383550)
Supplement: mmc1.pdf [file mmc1.pdf]

**YMTHE, Volume 25**

**Supplemental Information**

**Viral Vector Reprogramming of Adult  
Resident Striatal Oligodendrocytes  
into Functional Neurons**

**Marc S. Weinberg, Hugh E. Criswell, Sara K. Powell, Aadra P. Bhatt, and Thomas J. McCown**

*Supplementary Figure S1:*

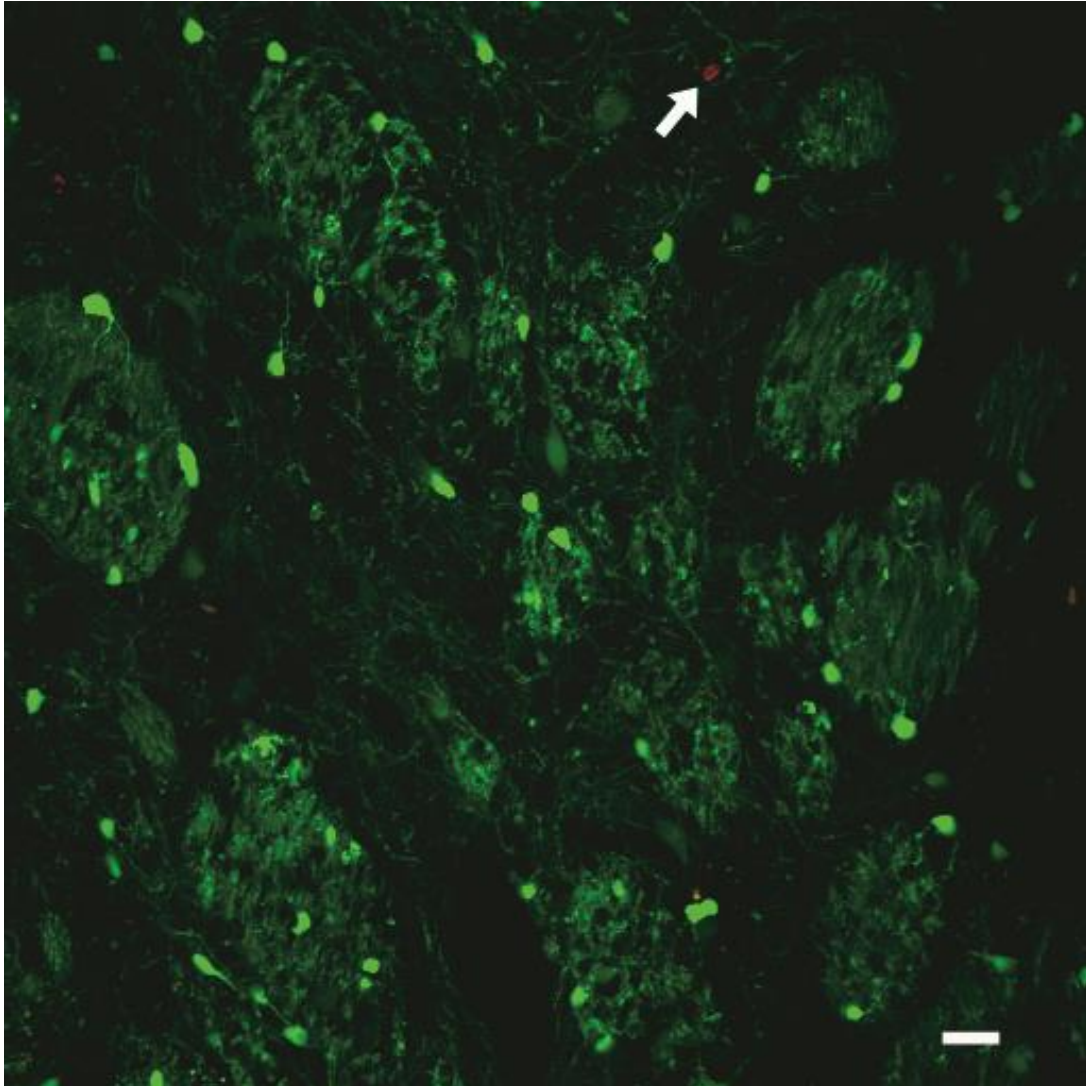

**Olig001 AAV-GFP vectors do not transduce dividing cells in the rat striatum.** Rats received a 100 mg/kg i.p. dose of BrdU 30 minutes prior to Olig001-AAV-GFP infusion into the striatum and a second 100 mg/kg i.p. dose of BrdU 30 minutes post-vector infusion. Two weeks later, as expected very few dividing cells were found in the striatum, although this labeling protocol resulted in many BrdU positive cells in the sub-granular zone of the dentate gyrus (data not shown). As seen in the confocal image the dividing cell (red cell, white arrow) did not co-localize with the GFP positive cells. No instances of GFP/BrdU co-localization were found throughout the areas of transduction for 2 rats. (horizontal bars = 20 microns)
